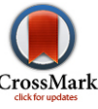

# [Pt(*O,O'*-acac)( $\gamma$ -acac)(DMS)] Alters SH-SY5Y Cell Migration and Invasion by the Inhibition of Na<sup>+</sup>/H<sup>+</sup> Exchanger Isoform 1 Occurring through a PKC- $\epsilon$ /ERK/mTOR Pathway

Antonella Muscella<sup>1</sup>, Carla Vetrugno<sup>2</sup>, Nadia Calabriso<sup>3</sup>, Luca Giulio Cossa<sup>3</sup>, Sandra Angelica De Pascali<sup>4</sup>, Francesco Paolo Fanizzi<sup>4</sup>, Santo Marsigliante<sup>3\*</sup>

**1** Cell Pathology Lab, Dipartimento di Scienze e Tecnologie Biologiche e Ambientali (Di.S.Te.B.A.), Salento University, Lecce, Italy, **2** Neuropathology Unit, Istituto di Neurologia sperimentale e Divisione di Neuroscienze, Istituto Scientifico IRCCS San Raffaele (sezione di Lecce), Milano, Italy, **3** Cell Physiology Lab, Dipartimento di Scienze e Tecnologie Biologiche e Ambientali (Di.S.Te.B.A.), Salento University, Lecce, Italy, **4** General and Inorganic Chemistry Lab, Dipartimento di Scienze e Tecnologie Biologiche e Ambientali (Di.S.Te.B.A.), Salento University, Lecce, Italy

## Abstract

We previously showed that [Pt(*O,O'*-acac)( $\gamma$ -acac)(DMS)] ([Pt(acac)<sub>2</sub>(DMS)]) exerted substantial cytotoxic effects in SH-SY5Y neuroblastoma cells, and decreased metalloproteases (MMPs) production and cells migration in MCF-7 breast cancer cells. The ubiquitously distributed sodium-hydrogen antiporter 1 (NHE1) is involved in motility and invasion of many solid tumours. The present study focuses on the effects of [Pt(acac)<sub>2</sub>(DMS)] in SH-SY5Y cell migration and also on the possibility that NHE1 may be involved in such effect. After sublethal [Pt(acac)<sub>2</sub>(DMS)] treatment cell migration was examined by wounding assay and cell invasion by transwell assay. NHE1 activity was measured in BCECF-loaded SH-SY5Y as the rate of Na<sup>+</sup>-dependent intracellular pH recovery in response to an acute acid pulse. Gelatin zymography for MMP-2/9 activities, Western blottings of MMPs, MAPKs, mTOR, S6 and PKCs and small interfering RNAs to PKC- $\epsilon$ / $\delta$  mRNA were performed. Sublethal concentrations of [Pt(acac)<sub>2</sub>(DMS)] decreases NHE1 activity, inhibites cell migration and invasion and decreases expression and activity of MMP-2 and -9. [Pt(acac)<sub>2</sub>(DMS)] administered to SH-SY5Y cells provokes the increment of ROS, generated by NADPH oxidase, responsible for the PKC- $\epsilon$  and PKC- $\delta$  activation. Whilst PKC- $\delta$  activates p38/MAPK, responsible for the inhibition of MMP-2 and -9 secretion, PKC- $\epsilon$  activates a pathway made of ERK1/2, mTOR and S6K responsible for the inhibition of NHE1 activity and cell migration. In conclusion, we have shown a drastic impairment in tumour cell metastatization in response to inhibition of NHE1 and MMPs activities by [Pt(acac)<sub>2</sub>(DMS)] occurring through a novel mechanism mediated by PKC- $\delta$ / $\epsilon$  activation.

**Citation:** Muscella A, Vetrugno C, Calabriso N, Cossa LG, De Pascali SA, et al. (2014) [Pt(*O,O'*-acac)( $\gamma$ -acac)(DMS)] Alters SH-SY5Y Cell Migration and Invasion by the Inhibition of Na<sup>+</sup>/H<sup>+</sup> Exchanger Isoform 1 Occurring through a PKC- $\epsilon$ /ERK/mTOR Pathway. PLoS ONE 9(11): e112186. doi:10.1371/journal.pone.0112186

**Editor:** Ken Arai, Massachusetts General Hospital/Harvard Medical School, United States of America

**Received:** July 31, 2014; **Accepted:** October 13, 2014; **Published:** November 5, 2014

**Copyright:** © 2014 Muscella et al. This is an open-access article distributed under the terms of the Creative Commons Attribution License, which permits unrestricted use, distribution, and reproduction in any medium, provided the original author and source are credited.

**Data Availability:** The authors confirm that all data underlying the findings are fully available without restriction. All relevant data are within the paper.

**Funding:** The work presented was supported by the Italian Ministry of Research and University (PRIN 2009: 'Sintesi, caratterizzazione e studio del pathway d'induzione apoptotica di composti antitumorali di Pt per target non genomic.') The funders had no role in study design, data collection and analysis, decision to publish, or preparation of the manuscript.

**Competing Interests:** The authors have declared that no competing interests exist.

\* Email: santo.marsigliante@unisalento.it

## Introduction

Neuroblastoma is the most common tumor among children under 1 year of age and is therefore prone to early metastasis; in 60–70% of neuroblastoma cases, systemic organ or bone marrow metastasis is detected at presentation and is the leading cause of death in these patients. It is of great significance to explore the metastatic mechanisms of neuroblastoma, particularly the mechanisms underlying its systemic dissemination. Cell migration is a complex dynamic process that involves multiple biological features. Highly proliferating cancer cells generate increased levels of lactic acid by Warburg [1]. Intracellular H<sup>+</sup>, increased as a result of lactic acid dissociation, is actively transported out of the cell with resultant acidification of the extracellular space by the activities of sodium-hydrogen antiporters. Among these exchang-

ers, NHE1 is considered a main regulator of intracellular pH (pHi) in cancer cells; it is regulated by pHi and oncogenic transformation [2]. NHE1 expression and activity have been shown to enhance cell migration [3–5] and also the invasive capability of tumor cells [6–9]. The mechanisms by which NHE1 contributes to cell motility are diverse. NHE1 affects cell migration by (i) linking cell volume and directed locomotion [10], (ii) stabilizing the cytoskeleton via regulation of the intracellular pH, (iii) serving as an anchor to attach the cytoskeleton to the plasma membrane [11], (iv) exporting H<sup>+</sup> across the plasma membrane [11], [12], (v) interacting with the signalling molecules [13], [14] and [9] and (vi) controlling gene expression [15]. Since migrating cells may show less sensitivity to standard chemotherapy [16–18], the best strategy for cancer therapy must inhibit and/or reduce the spread of tumor

cells by targeting the factors which regulate the invasive and migratory activity of cancer cells and so prevent metastasis.

In the present study we use [Pt(O,O'-acac)( $\gamma$ -acac)(DMS)] ([Pt(acac)<sub>2</sub>(DMS)]), a Pt(II) complex specifically designed and synthesized by some of us [19] to overcome some of the problems related to the well-established anticancer drug *cisplatin*. [Pt(acac)<sub>2</sub>(DMS)] is very stable under physiological conditions [20] showing low reactivity with nucleobases and high specific reactivity with sulphur ligands [19], suggesting interaction with non-genomic targets, which could be proteins involved in key pathways of the cell metabolism [21]. The effectiveness of [Pt(acac)<sub>2</sub>(DMS)] on various cell cultures *in vitro* (from endometrium, breast, brain, mesothelium etc.) indicates that it does not require extracellular organismic activation. The possibility that it may act as an intracellularly activated prodrug is also very low. This is because being DMS (dimethylsulphide) the only labile ligand in the metal coordination sphere of this complex, covalent binding to a biological target via DMS substitution or host guest interaction with a specific cellular receptor are the expected drug action mechanisms. Recent work also demonstrated that in these complexes substitution of the sulphur ligand with the much more inert ammonia gave almost the same *in vitro* cytotoxicity results on cisplatin resistant MCF-7 cells, therefore an activity based on some molecular recognition mechanism may be involved [22]. The ability of this compound to induce apoptosis in human cancer cells has been studied and compared to *cisplatin*. [Pt(acac)<sub>2</sub>(DMS)] exerts higher and selective cytotoxicity towards cancer, as observed in immortalized cell lines and confirmed in breast cancer cells in primary cultures and in mouse xenograft model of breast cancer [20], [23–28]. We previously showed that [Pt(acac)<sub>2</sub>(DMS)] is able to exert cytotoxic effects also on the human neuroblastoma SH-SY5Y cells, which are immature neuroblasts [24] that may represent a reliable model for studying the ability of [Pt(acac)<sub>2</sub>(DMS)] to exert specific antimetastatic responses *in vitro*. In this paper, we provide evidence that sublethal doses of [Pt(acac)<sub>2</sub>(DMS)] altered some basic biological features of the SH-SY5Y cells, such as the NHE1-mediated regulation of pHi, migration and invasion.

Several protein kinases have been proposed to regulate NHE1 activity, including ERK1/2, NIK, ROCK1, mTOR, p90<sup>RSK</sup> and p70<sup>RSK</sup>. Among these, ERK1/2 activation has been demonstrated to regulate the Na<sup>+</sup>/H<sup>+</sup> exchange, either positively [29] or negatively [30] and [31]; the role of p70<sup>RSK</sup> in the regulation of NHE1 is beginning to be understood, but its implication in cell migration and invasion need to be further evaluated. Therefore, another purpose of the present study was to investigate the diverse intracellular pathways involved in the regulation of Na<sup>+</sup>/H<sup>+</sup> exchange, migration and invasion after [Pt(acac)<sub>2</sub>(DMS)] administration.

Regarding invasion, migrating cells must break through the basement membrane by secreting enzymes, including metalloproteinases [32]. We previously showed that [Pt(acac)<sub>2</sub>(DMS)] exerts antimetastatic responses *in vitro*, decreasing metalloproteinase production in MCF-7 cells. Thus, to further investigate the molecular mechanism affecting invasion of SH-SY5Y cells, we studied the [Pt(acac)<sub>2</sub>(DMS)]-mediated decrease of MMP 2 and 9 activities.

Our results provide new insights into the relationship between NHE1 and metastatic process, and also demonstrate that activation of ERK is a critical component of the signaling pathway through which [Pt(acac)<sub>2</sub>(DMS)] inhibits Na<sup>+</sup>/H<sup>+</sup> exchange.

## Materials and Methods

### Cell culture

The human neuroblastoma cell line SH-SY5Y from ICLC (Genova, Italy) is a neuron-like cells of human central nervous system origin. SH-SY5Y cells were grown in a 1:1 mixture of Dulbecco's modified Eagle's medium and Ham's F-12 (Celbio, Pero, Milan, Italy) supplemented with 10% foetal bovine serum, penicillin (100 U/mL) and streptomycin (100 mg/mL), in a humidified atmosphere of 5% CO<sub>2</sub> in air. Cells were grown to 70–80% confluence and then treated with Pt compounds at various concentrations and for different incubation periods.

### Cell proliferation assay

The SRB (sulforhodamine B) assay was used as an indicator of cell number as described previously [20]. The percentage of survival was calculated as the absorbance ratio of treated to untreated cells. Viable cells were also counted by the trypan blue exclusion assay and light microscopy.

The data presented are means  $\pm$  standard deviation (S.D.) from eight replicate wells per microtitre plate.

### Cell wounding and migration assay

The cells were seeded in 12-well culture dishes and cultured until they reached confluence. The cells were then scraped with a 200  $\mu$ L micro-pipette tip, denuding a strip of the monolayer approximately 500  $\mu$ m in diameter as described previously [33].

### Transwell invasion assay

SH-SY5Y cells were placed in the well of a multi-well tissue culture plate with inserts creating a two-chamber system separated by a cell-permeable membrane. Invasion is determined by counting those cells that have traversed the cell-permeable membrane having invaded below chamber.

### Intracellular pH measurements using BCECF

Intracellular pH was measured at 37°C with the fluorescent pH indicator 2',7'-bis-(2-carboxyethyl)-5(6)-carboxyfluorescein acetoxymethyl ester (BCECF-AM) from Molecular Probes, Inc. (Eugene, OR), using a Jasco FP-750 spectrofluorometer (Jasco International Co., Hachioji, Tokyo 192-0046, Japan). The cells were dye-loaded by an incubation for 45 min at room temperature with 2.5  $\mu$ M BCECF-AM then washed by centrifugation (twice). Using a computer running program (FL Spectra Manager, Jasco Int.), fluorescence was measured alternatively at 490 nm and 440 nm excitation (bandwidth 5 nm) and at constant emission wavelength of 530 nm (bandwidth 10 nm). On-line calculation of fluorescent ratios from these two excitation wavelengths was used to measure pHi. The fluorescence ratio gives concentration-independent, pH sensitive fluorescence measurements. One hundred microlitres of cell suspension (100  $\mu$ g of protein corresponding to  $1.5 \times 10^6$  cells) were injected into a cuvette equipped with an electronic stirring system. Fluorescence ratio measurements were made every 2 s. Na<sup>+</sup>/H<sup>+</sup> exchange activity was assayed as the initial rate of Na<sup>+</sup>-dependent pHi recovery after an acid load imposed by adding 20  $\mu$ l of a Na-propionate stock solution (3.03 M) to give a final concentration (in the cuvette) of 30 mM.

Zoniporide, a potent and selective inhibitor of the Na<sup>+</sup>/H<sup>+</sup> exchange 1, was added to the cuvette (100 nM) to prove that the Na<sup>+</sup>/H<sup>+</sup> dependent pHi recovery was due effectively to the Na<sup>+</sup>/H<sup>+</sup> exchanger activity.

### Calibration of the BCECF fluorescence signal

At the end of each experiment a calibration of the fluorescent signal was performed by monitoring the 490/440 nm excitation ratio at various intracellular pH (pHi) values. The pHi was set approximately equal to predetermined extra cellular pH values (from 6.3 to 7.8) using the K<sup>+</sup>/nigericin technique.

Cells were dye-loaded in K<sup>+</sup>-clamp solution (K<sup>+</sup> = 145 mM) containing 5  $\mu$ M nigericin. After the dye-loading interval, 100  $\mu$ l of cell suspension were injected in a cuvette containing 1,900  $\mu$ l of buffer at different pH and containing 0.5  $\mu$ M of the K<sup>+</sup>/H<sup>+</sup> ionophore nigericin. pH values were estimated by extrapolating the linear relationship between BCECF fluorescence and pH.

### MMP gelatin zymography

After [Pt(acac)<sub>2</sub>(DMS)] treatment, the culture medium was collected and SH-SY5Y cells were washed with PBS (phosphate-buffered saline) and harvested by scraping in 0.1 M Tris-HCl containing 0.2% Triton X-100. Both conditioned medium and cell lysates were centrifuged at 14,000 rpm for 5 min at 4°C to remove cells and debris as described previously [33].

### Western blotting

Preparation of subcellular fraction, western blotting analysis and immunodetection were performed as previously reported [34]. Densitometric analysis was carried out on the Western-blots using the NIH Image 1.62 software (National Institutes of Health, Bethesda, MD), normalizing to  $\beta$ -actin or  $\alpha$ -subunit of Na<sup>+</sup>/K<sup>+</sup>ATPase used as a controls.

### Preparation of small interfering RNA (siRNA) and siRNA transfection

Small interfering RNAs (siRNAs) were prepared by an in vitro transcription method, according to the manufacturer's protocol (Promega, Madison, WI, USA). Initially, four siRNA target sites specific to human PKC- $\epsilon$  and PKC- $\delta$  mRNA, as determined by blast analysis, were chosen. For each siRNA, sense and antisense templates were designed based on each target sequence and partial T7 promoter sequence.

Cells were transfected with siRNA duplexes using the protocol supplied with the CodeBreaker siRNA transfection reagent (Promega Corporation) as described previously [35].

### Statistical analysis

Experimental points represent means  $\pm$  standard deviation (S.D.). Statistical analysis was carried out using the ANOVA. When indicated, post hoc tests (Bonferroni/Dunn) were also performed. A *P* value less than 0.05 were considered to achieve statistical significance.

### Reagents

[Pt(acac)<sub>2</sub>(DMS)] was prepared according to previously reported procedures [19], [36]. Dulbecco's modified Eagle's medium, Ham's F-12, antibiotics, glutamine and foetal bovine serum (FBS) were purchased from Celbio (Pero, MI, Italy).

MMP-9, MMP-2, phospho-S6 (S235/236), phospho-specific p-Akt (Ser473) and total Akt, phospho-specific p-ERK1/2 and total ERK1/2, phospho-specific p-p38(Thr180/Tyr182) and total p38, phospho-specific p-src (Tyr416) and total src antibodies were obtained from Cell Signalling Technology (Celbio, Milan, Italy). PKC isoforms antibodies, S6, phospho-specific p-mTOR (Ser 2448) and total mTOR, goat anti-rabbit and donkey anti-goat conjugated with peroxidase, as well as control antibodies, were

obtained from Santa Cruz Biotechnology (USA). All others reagents were from Sigma (Milan, Italy).

## Results

### [Pt(acac)<sub>2</sub>(DMS)] prevents invasion and metastasis of SH-SY5Y human neuroblastoma cell line

We showed previously that exposure of the SH-SY5Y cells to [Pt(acac)<sub>2</sub>(DMS)] at concentrations ranging from 1 to 200  $\mu$ M resulted in a dose-dependent inhibition of cell survival [24]. In order to determine whether [Pt(acac)<sub>2</sub>(DMS)] had effects on SH-SY5Y cell invasion and migration without affecting cell viability, we here used low drug concentrations (0.10, 0.25 and 0.50  $\mu$ M) and assessed that were not able to induce apoptosis nor assayable cytotoxicity (Fig. 1A). *In vitro* invasion and migration assays, including transwell and wound-healing assays, were used to investigate the inhibitory effects of [Pt(acac)<sub>2</sub>(DMS)] on the invasive potency of neuroblastoma cells. As illustrated in Fig. 1B, the data from the wound-healing assay indicated that migration of SH-SY5Y cells was inhibited by [Pt(acac)<sub>2</sub>(DMS)]. [Pt(acac)<sub>2</sub>(DMS)] reduced the migration ability of these cells by 80% (*P* = 0.026 by Anova) after 24 h (Fig. 1C). Similarly, the data obtained from transwell invasion assays [37], showed that 0.5  $\mu$ M [Pt(acac)<sub>2</sub>(DMS)] inhibited the invasion of SH-SY5Y cells by 83% (Fig. 1D). These results suggest that [Pt(acac)<sub>2</sub>(DMS)] prevents invasion and migration of SH-SY5Y human neuroblastoma cell line.

The role of the NHE in tumour cell migration has not yet been established, thus we investigate the possibility that NHE1 is involved in such [Pt(acac)<sub>2</sub>(DMS)] effect. Both the migration ability and the transwell invasion potential were strongly inhibited by the specific NHE1 inhibitor, Zoniporide (Fig. 1B, C and D), leading to the hypothesis that the NHE1 plays a fundamental role in these processes.

### [Pt(acac)<sub>2</sub>(DMS)] suppresses invasion and migration through NHE1 dependent signalling pathways

SH-SY5Y cells constitutively express amiloride-sensitive NHE1 [38], [39]. NHE1 activity was measured in BCECF-loaded SH-SY5Y as the rate of Na-dependent pHi recovery in response to an acute acid pulse. Fig. 2A represents a normal response and a response in the presence of Zoniporide, a specific inhibitor of NHE1 activity [40]. Cells were exposed acutely to NH<sub>4</sub>Cl in the absence of extracellular Na<sup>+</sup>, after which the NH<sub>4</sub>Cl was removed from the superfusate (0 Na<sup>+</sup> solution), resulting in an intracellular acidification of  $\sim$ 0.9 pH units to  $\sim$ 6.3. As seen in Fig. 2A, there was no pHi recovery in the absence of extracellular Na<sup>+</sup>. Reintroduction of extracellular Na<sup>+</sup> resulted in a Na<sup>+</sup>-dependent intracellular alkalization back to a pHi of  $\sim$ 6.75, at a rate of 0.03 pH U/min. The rate (slope) of the Na<sup>+</sup>-dependent intracellular alkalization, calculated from the point at which recovery starts, as indicated by the dashed line in Fig. 2A, represents the NHE1 activity. A similar protocol was used in the presence of Zoniporide (100 nM), as indicated by the dotted line. Zoniporide blocked the Na<sup>+</sup>-dependent pHi recovery suggesting that NHE1 is responsible for the Na<sup>+</sup>-dependent pHi recovery in these cells.

Fig. 2B shows the basal NHE1 activity (recovery with 140 mM Na<sup>+</sup>) and its activities in the presence of increasing [Pt(acac)<sub>2</sub>(DMS)] concentrations: such activity decreased, in a dose-dependent manner, by 41%, 78% and 96% for 0.10, 0.25, 0.50  $\mu$ M [Pt(acac)<sub>2</sub>(DMS)], respectively (*p* < 0.001). In SH-SY5Y cells, the inhibition of Na/H exchanger activity was restricted to [Pt(acac)<sub>2</sub>(DMS)] since cisplatin (0.1, 1 and 10  $\mu$ M), did not affect it (new Fig. 2B).

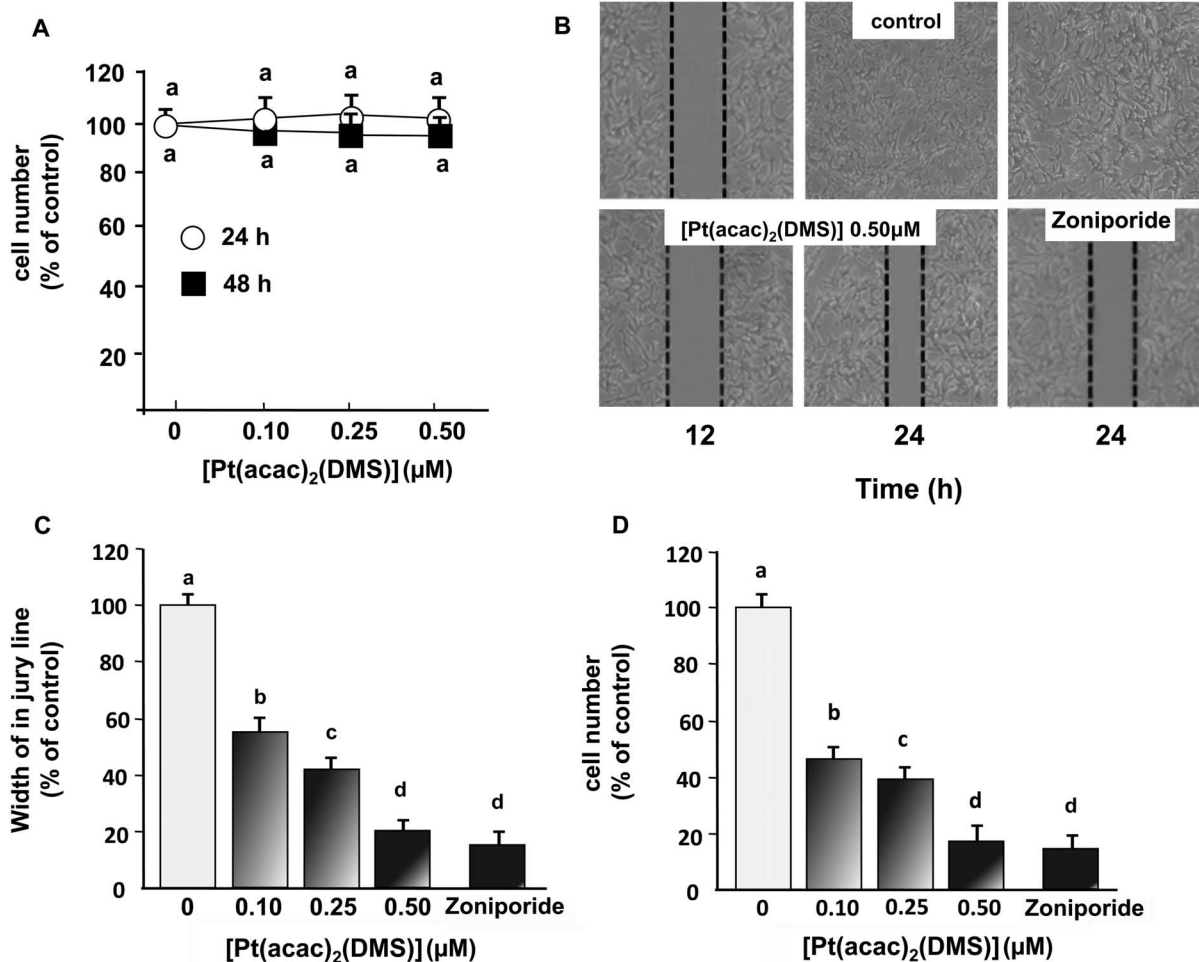

**Figure 1. [Pt(acac)<sub>2</sub>(DMS)] inhibition of SH-SY5Y cell migration and invasion.** Cells were treated or not with increasing concentrations of [Pt(acac)<sub>2</sub>(DMS)] and for the indicated time intervals. (A) Viable cell numbers were assessed by SRB assay as described in Methods. (B) Differential cell migration rate was examined using wound closure assay. Cells were treated or not with [Pt(acac)<sub>2</sub>(DMS)] or with the Zoniporide (100 nM) and monitored by microscopy at the indicated times. (C) Differential migration rate was assessed by measuring the distance between wound edges after 24 h at indicated [Pt(acac)<sub>2</sub>(DMS)] concentrations in at least eight randomly chosen regions of four different experiments (means  $\pm$  SD) normalized to 100% wound closure for control cells. (D) Cell invasion was measured using the transwell invasion assay system. The data are means  $\pm$  SD of four different experiments and are presented as per cent of control. Statistical analysis was carried out using the ANOVA ( $n = 4$ ): (A)  $P > 0.05$  for both "24 h" and "48 h"; (C, D)  $P < 0.0001$ . Values with shared letters are not significantly different according to Bonferroni/Dunn post hoc tests. doi:10.1371/journal.pone.0112186.g001

**Role of ERK1/2.** We previously showed that cytotoxic doses of [Pt(acac)<sub>2</sub>(DMS)] activated ERK1/2 [23], [24], [26]. Fig. 2C shows a representative experiment in which confluent SH-SY5Y cells were harvested at time 0, 1, 2, 5 and 10 min of exposure to 0.50  $\mu$ M of [Pt(acac)<sub>2</sub>(DMS)] and analyzed for activated ERK1/2. Results show that [Pt(acac)<sub>2</sub>(DMS)] provoked a time dependent activation of ERK1/2. To determine whether [Pt(acac)<sub>2</sub>(DMS)] block NHE1 activity by ERK1/2 activation, cells were preincubated with PD98056, a MEK inhibitor that prevented ERK1/2 activation (Fig. 2D). As shown in Fig. 2E, [Pt(acac)<sub>2</sub>(DMS)] inhibited the recovery response by 96% (from  $0.17 \pm 0.01$  to  $0.0068 \pm 0.015$   $\Delta$ pHi/min;  $P < 0.001$ ), whereas PD98056 restored the response to control (from  $0.18 \pm 0.02$  to  $0.19 \pm 0.04$ ). These results are consistent with [Pt(acac)<sub>2</sub>(DMS)]-induced ERK1/2 activation playing an inhibitory role on NHE1 activity. To confirm this, we blocked the MEK-induced ERK1/2 activation by preincubating with PD98059 (0–25  $\mu$ M) and then determined whether [Pt(acac)<sub>2</sub>(DMS)] would still effect cell migration. The

effects of [Pt(acac)<sub>2</sub>(DMS)] on wound-healing assays were reversed by PD98056 (Fig. 2F).

**Role of p70S6K.** The role of p70S6K in cell migration [41] and in the regulation of NHE activity [42] has been established. We studied the phosphorylation of S6, a downstream component in mTOR signaling pathway, and used it as a marker for p70S6K activation. Phosphorylation of S6 was observed 1 min after [Pt(acac)<sub>2</sub>(DMS)] treatment reaching a maximum at 10 min (Fig. 3A). [Pt(acac)<sub>2</sub>(DMS)] had effects also on additional signaling components in the p70S6K pathways, i.e. increased mTOR phosphorylation, with the same kinetic of S6 phosphorylation, without changing the total mTOR level (Fig. 3A). PD98059 prevented the activations of both S6 and mTOR, suggesting that MEK/ERK pathway plays a role in the regulation of both proteins in cells challenged with [Pt(acac)<sub>2</sub>(DMS)] (Fig. 3B).

We investigated the role of mTOR and PI3K in [Pt(acac)<sub>2</sub>(DMS)] effects; thus, two commonly used PI3K inhibitors, LY294002 and wortmannin and the mTOR inhibitor rapamycin (the most potent inhibitor of p70S6K [43]) were used. Rapamycin

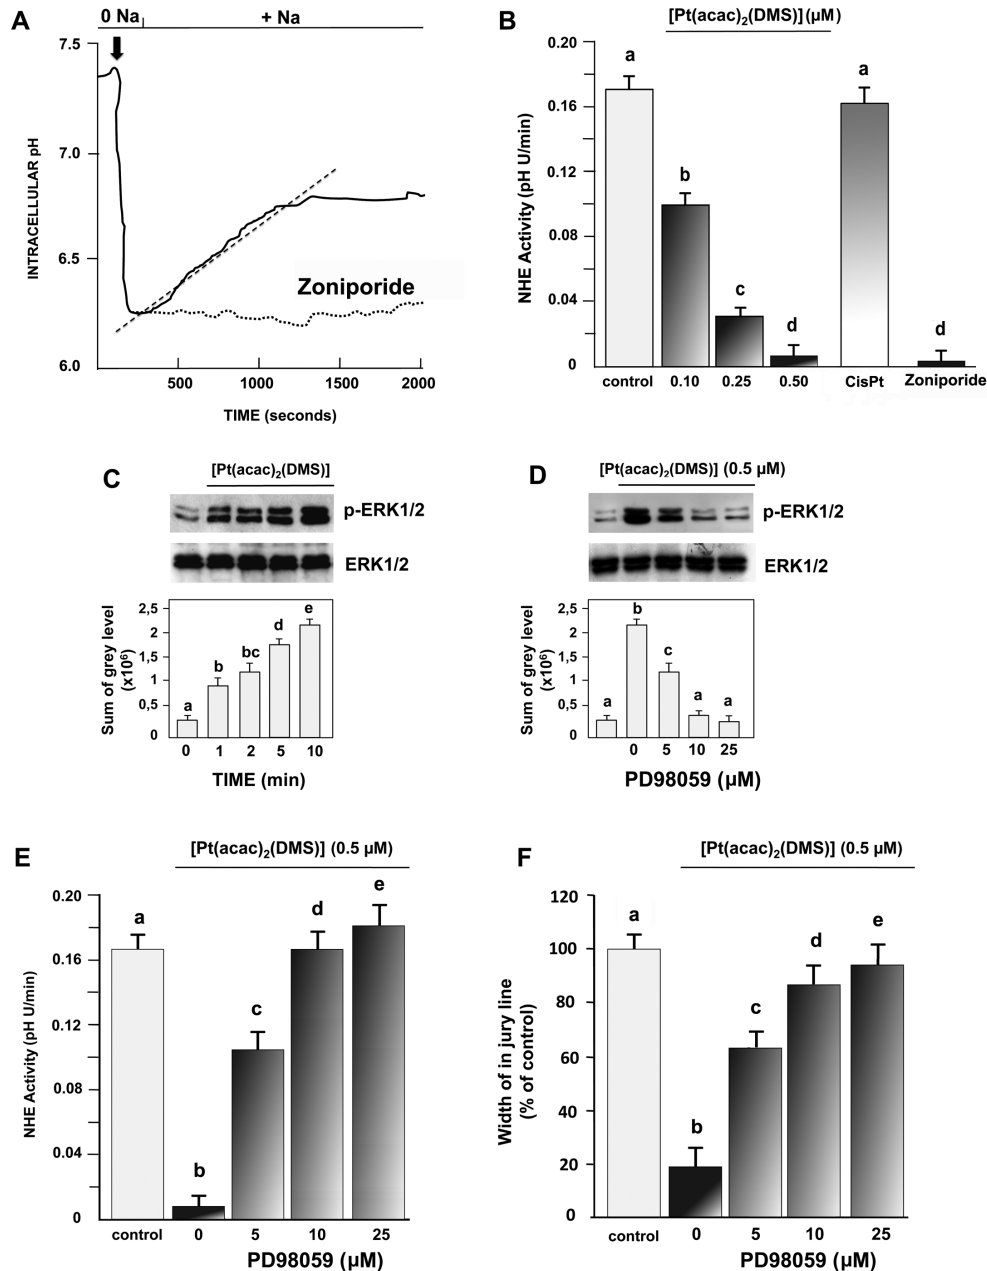

**Figure 2. The [Pt(acac)<sub>2</sub>(DMS)] inhibition of NHE1 activity in SH-SY5Y is mediated by ERK1/2 activation.** (A) Representative experimental traces showing the Na<sup>+</sup>-dependent intracellular pH (pHi) recovery response after acute exposure to an NH<sub>4</sub>Cl acid pulse in the absence and presence of Zoniporide. In the experimental protocol, the cells were initially superfused with Na<sup>+</sup>-Ringer solution and then with 20 mM NH<sub>4</sub>Cl (arrow), resulting in an intracellular acidification. In the absence of extracellular Na<sup>+</sup> (0 Na<sup>+</sup>), there was no measurable pHi recovery. With the reintroduction of extracellular Na<sup>+</sup> (+Na<sup>+</sup>), pHi increases due to activation of the membrane-bound pHi regulatory mechanism, Na<sup>+</sup>/H<sup>+</sup> exchanger (NHE). The rate of the Na<sup>+</sup>-dependent pHi recovery was measured as the slope of the Na<sup>+</sup>-dependent intracellular alkalinization and represented by the dashed lines ( $\Delta$ pHi/dt; NHE activity). Pointed line: representative trace of the Na<sup>+</sup>-dependent pHi recovery after acute exposure to an NH<sub>4</sub>Cl acid load in SH-SY5Y cells, in presence of the Zoniporide (100 nM). (B) Bar graph comparing the Na<sup>+</sup>-dependent pHi recovery after acute exposure to NH<sub>4</sub>Cl in SH-SY5Y cells in presence of crescent concentrations of [Pt(acac)<sub>2</sub>(DMS)] or 10  $\mu$ M cisplatin or the Zoniporide (100 nM). (C) SH-SY5Y cells were treated or not with 0.50  $\mu$ M of [Pt(acac)<sub>2</sub>(DMS)]. Cell lysates were analysed by Western blotting with anti-unphosphorylated (ERK1/2) and -phosphorylated (p-ERK1/2) ERK1/2 antibodies for the indicated times. Representative immunoblots of four experiments are depicted and results from densitometry are expressed as mean  $\pm$  SD (n=4) of sum of the gray level values. (D, E and F) SH-SY5Y cells were pre incubated or not with different concentrations of PD98059 and then treated with 0.50  $\mu$ M [Pt(acac)<sub>2</sub>(DMS)]. (D) Cell lysates were analysed by western blotting with anti-unphosphorylated (ERK1/2) and -phosphorylated (p-ERK1/2) ERK1/2 antibodies. Representative immunoblots of three experiments are depicted and results from densitometry are expressed as mean  $\pm$  SD (n=4) of sum of the gray level values. (E) NHE activity, after acute exposure to an NH<sub>4</sub>Cl acid load, was measured and (F) cell migration was examined using wound closure assay. Migration rate of wound closure were assessed by measuring the distance between wound edges in at least eight randomly chosen regions of three different experiments (average  $\pm$  SD) normalized to 100% wound closure for control cells. The data are means  $\pm$  S.D. obtained from 4 different experiments. (B-F) P<0.0001 by one-way ANOVA (n=4); values with shared letters are not significantly different according to Bonferroni/Dunn post hoc tests. doi:10.1371/journal.pone.0112186.g002

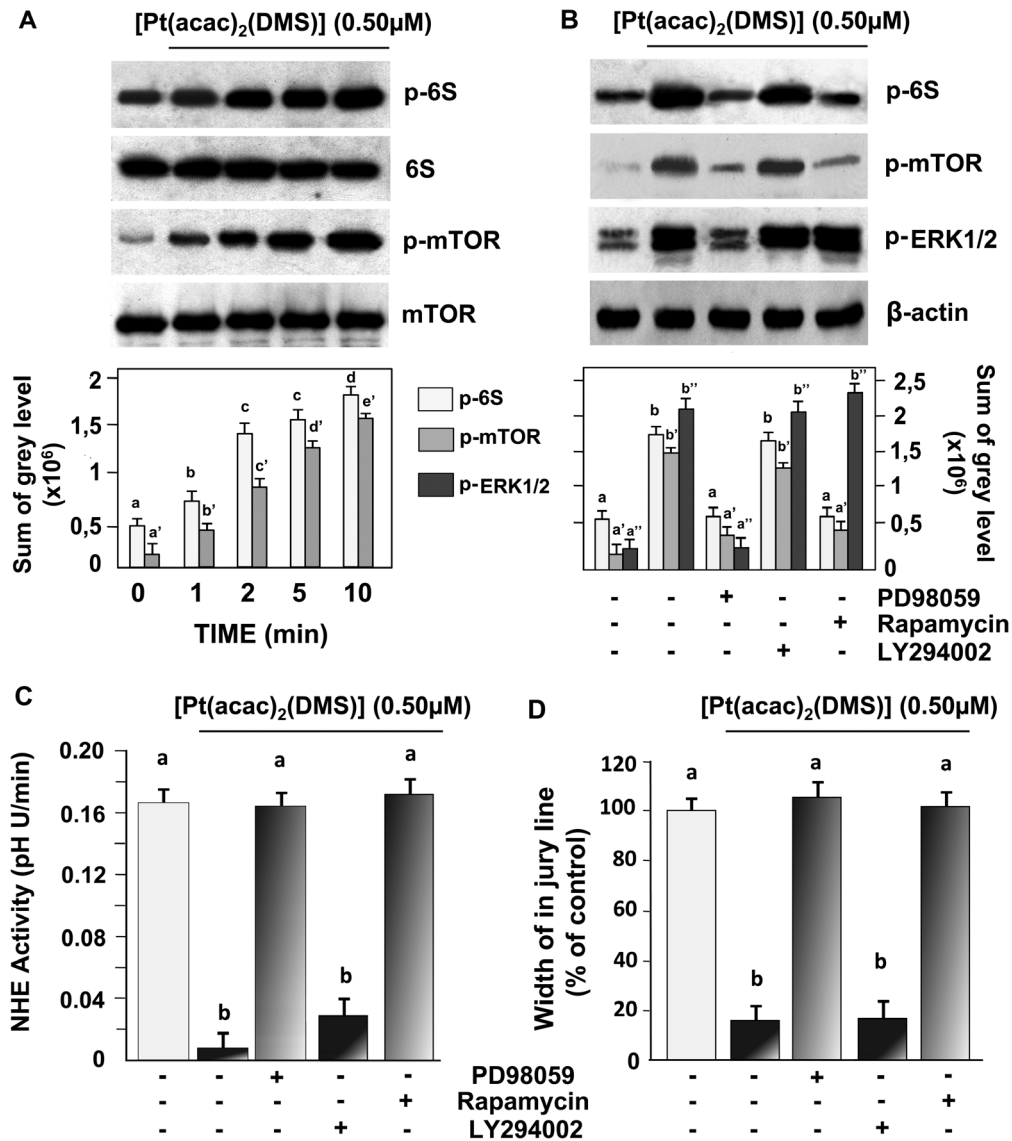

**Figure 3. Role of p70 S6 Kinase in [Pt(acac)<sub>2</sub>(DMS)] inhibition of SH-SY5Y cell migration.** (A) SH-SY5Y cells were incubated or not with 0.50 μM [Pt(acac)<sub>2</sub>(DMS)] for the indicated times. Cell lysates were analysed by western blotting with anti-unphosphorylated (6S and mTOR) and phosphorylated (p-6S and p-mTOR) 6S and mTOR antibodies. (B, C and D) SH-SY5Y cells were preincubated with 0.50 μM of [Pt(acac)<sub>2</sub>(DMS)] in absence or in presence of PD98056, rapamycin or LY294002. (B) Cell lysates were analysed by western blotting with anti-phosphorylated 6S, mTOR and ERK1/2 antibodies. Control loadings are shown by β-actin, representative immunoblots of four experiments are depicted and results from densitometry are expressed as mean ± SD (n=4) of sum of the gray level values. (C) NHE activities, after acute exposure to an NH<sub>4</sub>Cl acid load, were measured and cell migration was examined using wound closure assay. Migration rate of wound closure were assessed by measuring the distance between wound edges in at least eight randomly chosen regions of three different experiments (average ± SD) normalized to 100% wound closure for control cells. Representative immunoblots of four experiments are depicted and results from densitometry are expressed as mean ± SD (n=4) of sum of the gray level values. The data are means ± S.D. obtained from 4 different experiments. (A–D) P<0.0001 by one-way ANOVA (n=4); values with shared letters are not significantly different according to Bonferroni/Dunn post hoc tests. doi:10.1371/journal.pone.0112186.g003

(30 nM) almost completely abolished the [Pt(O,O'-acac)(γ-acac)(DMS)]-induced mTOR and S6 phosphorylations and also abolished the inhibition of NHE1. Rapamycin did not affect the [Pt(acac)<sub>2</sub>(DMS)]-induced ERK1/2 phosphorylation (Fig. 3B). LY294002 and wortmannin (data not shown) had no effect on S6 phosphorylation due to [Pt(acac)<sub>2</sub>(DMS)] (Fig. 3B). These results indicate that mTOR mediates the regulatory interaction between NHE1 and ERK1/2. In addition, rapamycin reversed the [Pt(acac)<sub>2</sub>(DMS)] effects on NHE1 inhibition (Fig. 3C) and on wound-healing assays (Fig. 3D), but not effects on [Pt(acac)<sub>2</sub>(DMS)]-induced inhibition of SH-SY5Y cells Matrigel

invasion were observed (Fig. 4E). Finally, human MMP-2 and MMP-9 active proteins added to cells preincubated with rapamycin (30 nM), or with PD98059 (25 μM), and stimulated with [Pt(acac)<sub>2</sub>(DMS)], restored cell invasion capacity (Fig. 4E).

**[Pt(acac)<sub>2</sub>(DMS)] decreases expression and activity of MMP-2 and -9**

It is known that MMP-2 and MMP-9 expression may be related to metastasis and progression of neuroblastoma. The role of MMP-2 and MMP-9 in SH-SY5Y cell invasion was assessed using

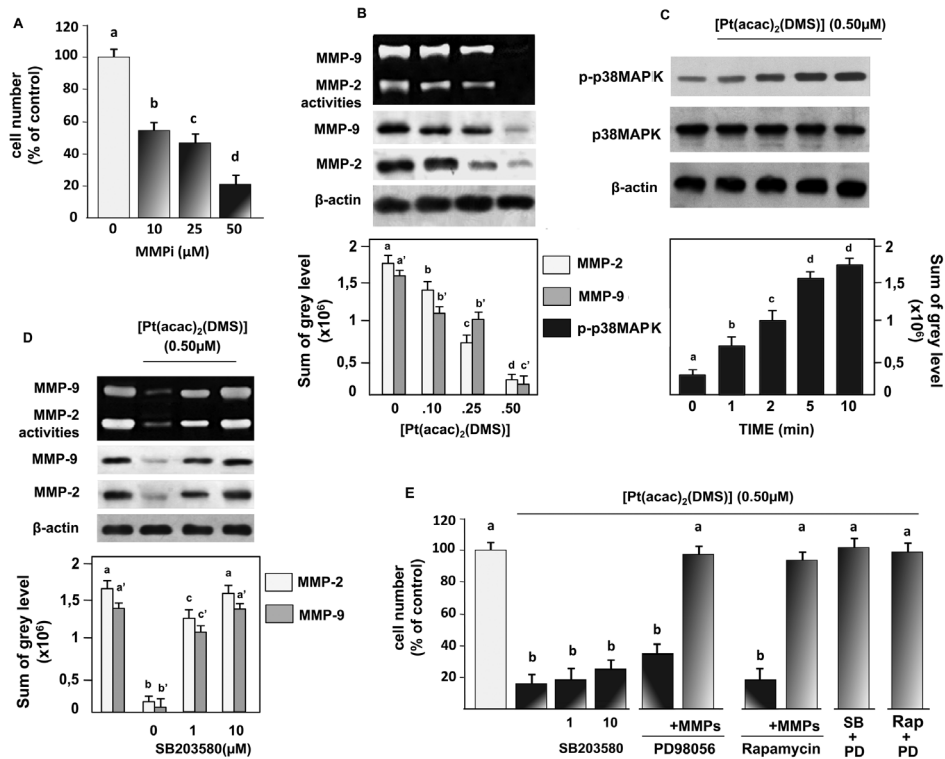

**Figure 4. [Pt(acac)<sub>2</sub>(DMS)] inhibition of SH-SY5Y cell invasion is mediated by MMP-2 and MMP-9.** (A) SH-SY5Y cells were treated or not with crescent concentrations of MMPs inhibitor (MMPI) and cell invasion was measured using the transwell invasion assay system, after 24 h. The data are means  $\pm$  SD of four different experiments and are presented as per cent of control. (B) Cells were treated or not with increasing concentrations of [Pt(acac)<sub>2</sub>(DMS)] for 24 h; conditioned media and cell lysates were subjected to gelatin zymography and Western blot analysis with anti-MMP-2 and anti-MMP-9 antibodies, respectively. (C) SH-SY5Y cells were incubated with 0.50  $\mu$ M [Pt(acac)<sub>2</sub>(DMS)] for the indicated times and cell lysates were subjected to Western blot analysis with anti-unphosphorylated (p38MAPK) and -phosphorylated (p-p38MAPK) p38MAPK antibodies. (D) SH-SY5Y cells were preincubated with different concentration of SB203580 and then treated or not with [Pt(acac)<sub>2</sub>(DMS)] for 24 h. Conditioned media and cell lysates were subjected to gelatin zymography and Western blot analysis with anti-MMP-2 and anti-MMP-9 antibodies, respectively. For Western blotting, control loadings are shown by  $\beta$ -actin and representative immunoblots of four experiments are depicted; results from densitometry are expressed as mean  $\pm$  SD (n=4) of sum of the gray level values. (E) SH-SY5Y cells were preincubated with 0.50  $\mu$ M [Pt(acac)<sub>2</sub>(DMS)] in absence or in presence of SB203580 (SB), PD98056 (PD), rapamycin (Rap), alone or in combination, and of human MMP-2 and MMP-9 active proteins (MMPs), in combination to PD98056 or rapamycin. Cell invasion was measured using the transwell invasion assay system. The data are means  $\pm$  S.D. obtained from 4 different experiments. (A–E) P<0.0001 by one-way ANOVA (n=4); values with shared letters are not significantly different according to Bonferroni/Dunn post hoc tests. doi:10.1371/journal.pone.0112186.g004

the MMP-2/MMP-9 inhibitor II. Pretreatment of cells with MMP-2/MMP-9 inhibitor II blocked cell invasion in a concentration-dependent manner (Fig. 4A) but did not alter the effect of [Pt(acac)<sub>2</sub>(DMS)] on cells viability (data not shown). These data implied that the effect of MMP-2/MMP-9 inhibition on Matrigel invasion cannot be simply attributed to the inhibition of cell proliferation. [Pt(acac)<sub>2</sub>(DMS)] had effects on both the levels and activities in of MMP-2 and -9 (Fig. 4B).

We showed previously that exposure of SH-SY5Y cells to 1–100  $\mu$ M [Pt(acac)<sub>2</sub>(DMS)] provoked the phosphorylation of p38MAPK and JNK1/2 [24]. Western blot analysis of phosphorylated p38MAPK revealed that sublethal doses of [Pt(acac)<sub>2</sub>(DMS)] induced a time-dependent phosphorylation of p38MAPK, without affecting the overall level (Fig. 4C). Thus, the effect of specific inhibitors of p38MAPK on [Pt(acac)<sub>2</sub>(DMS)]-induced MMP 2 and 9 inhibition were examined. When SH-SY5Y cells were pretreated for 30 min with SB203580 (1 and 10 mM), and then with 0.50  $\mu$ M [Pt(acac)<sub>2</sub>(DMS)] for 24 h, the inhibition of MMP-2 and MMP-9 expression levels was blocked (Fig. 4D), but the effects of [Pt(acac)<sub>2</sub>(DMS)] on Matrigel invasion were unchanged (Fig. 4E). Furthermore, the effects of [Pt(acac)<sub>2</sub>(DMS)] on Matrigel invasion were reversed when SH-SY5Y

cells were pretreated with SB203580 plus PD98059 or SB203580 plus rapamycin (Fig. 4E).

### The mechanism of [Pt(acac)<sub>2</sub>(DMS)]-induced MAPK phosphorylation

**Role of PKCs.** We previously showed that ROS (reactive oxygen species) generated by NADPH oxidase was responsible for the [Pt(acac)<sub>2</sub>(DMS)]-mediated PKC- $\delta$  and - $\epsilon$  activation and consequential phosphorylation of p38MAPK and ERK1/2 [24]. Thus, we used molecular techniques (PKC- $\epsilon$ -siRNA and PKC- $\delta$ -siRNA) in order to inhibit PKC- $\epsilon$  and PKC- $\delta$  and establish their role in MAPKs control. Preliminary experiments by Western blotting demonstrated that PKC- $\epsilon$ -siRNA and PKC- $\delta$ -siRNA were able to decrease PKC- $\epsilon$  and PKC- $\delta$  expressions whilst non specific siRNA (siRNA-NS) had no silencing effect [24]. PKC- $\delta$ -siRNA blocked p38MAPK phosphorylation and MMP-2/MMP-9 activities inhibition by [Pt(acac)<sub>2</sub>(DMS)] (Fig. 5A). PKC- $\epsilon$ -siRNA inhibited ERK1/2, S6 and mTOR phosphorylation and reversed the effects of [Pt(acac)<sub>2</sub>(DMS)] on both NHE1 activity (Fig. 5C, D) and cell migration (Fig. 5D). The inhibition of transwell migration

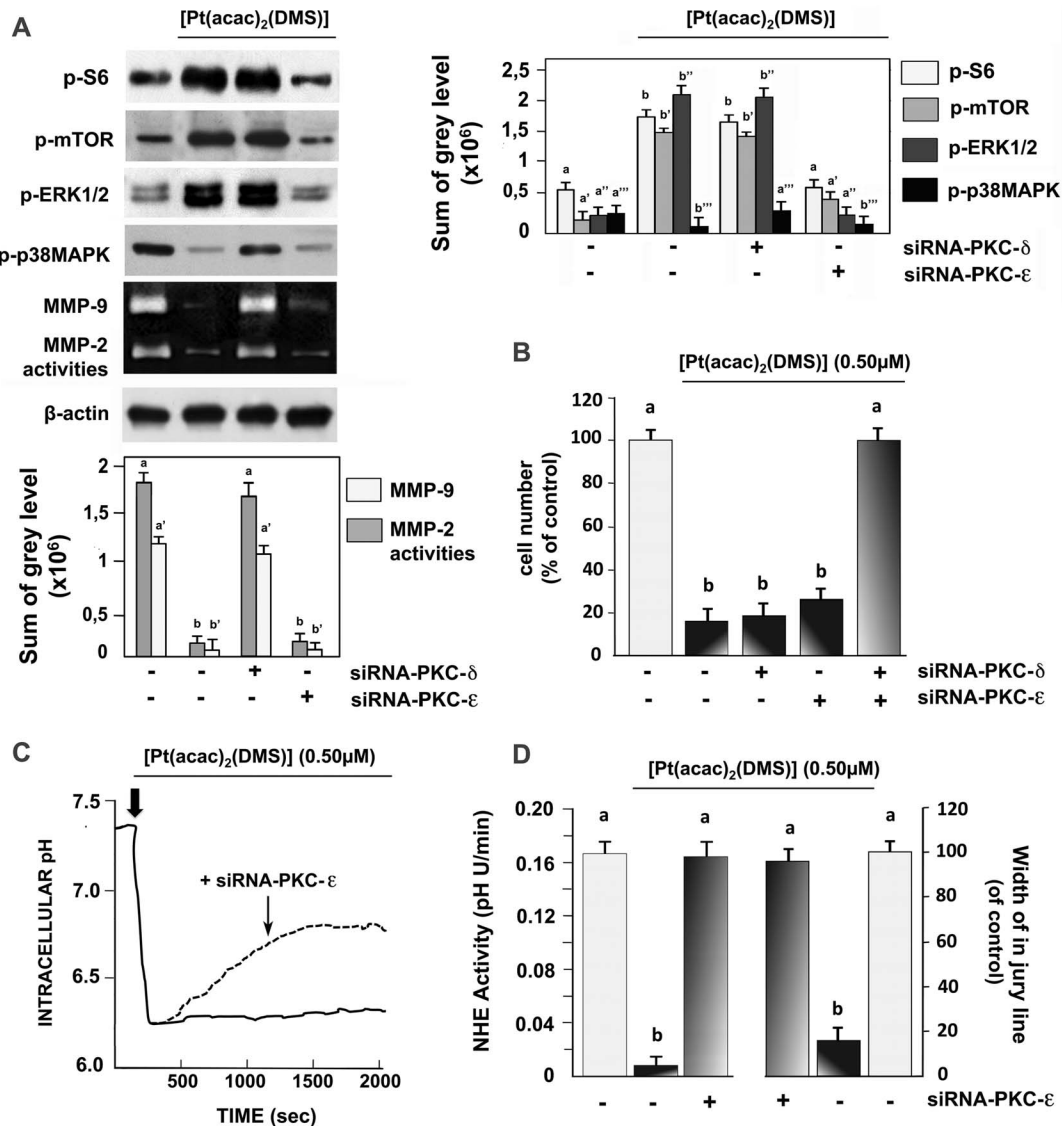

**Figure 5. Role of PKCs in [Pt(acac)<sub>2</sub>(DMS)] inhibition of SH-SY5Y cell migration and invasion.** (A, B) Cells were transfected with siRNA-PKC- $\epsilon$  and -PKC- $\delta$  and then were incubated with 0.50  $\mu$ M [Pt(acac)<sub>2</sub>(DMS)]. (A) Western blotting of total lysates was performed with specific phosphorylated anti-S6, -mTOR, -p38MAPK and -ERK1/2; conditioned media were subjected to gelatin zymography. Representative immunoblots of four experiments are depicted and results from densitometry are expressed as mean  $\pm$  SD (n = 4) of sum of the gray level values. (B) Cell invasion was measured using the transwell invasion assay system. The data are means  $\pm$  SD of four different experiments and are presented as per cent of control. (C) Representative trace of the Na<sup>+</sup>-dependent pHi recovery after acute exposure to an NH<sub>4</sub>Cl acid load in SH-SY5Y cells, in presence or absence of the siRNA-PKC- $\epsilon$ . *Left*: Bar graph comparing the Na<sup>+</sup>-dependent pHi recovery (U/min) after acute exposure to NH<sub>4</sub>Cl acid, in presence or absence of the siRNA-PKC- $\epsilon$ . *Right*: Migration rate of wound closure were assessed by measuring the distance between wound edges in at least eight randomly chosen regions of three different experiments (average  $\pm$  SD) normalized to 100% wound closure for control cells, in presence or absence of the siRNA-PKC- $\epsilon$ . The data are means  $\pm$  S.D. obtained from 4 different experiments. (A, B, D) P < 0.0001 by one-way ANOVA (n = 4); values with shared letters are not significantly different according to Bonferroni/Dunn post hoc tests. doi:10.1371/journal.pone.0112186.g005

due to [Pt(acac)<sub>2</sub>(DMS)] was blocked when PKC- $\epsilon$  and PKC- $\delta$  were both silenced (Fig. 5B).

**Role of ROS.** Previous observations indicated that some ROS-mediated events, initiated by [Pt(acac)<sub>2</sub>(DMS)], led to inhibition of migration of mammary tumour cells [33]. Here, the NADPH oxidase specific inhibitor DPI was able to inhibit the cytosol-to-membrane translocation of PKC- $\epsilon$  and PKC- $\delta$  and the ERK1/2 and p38MAPK phosphorylation (Fig. 6B). DPI also markedly suppressed [Pt(acac)<sub>2</sub>(DMS)] inhibition of MMP-2 and MMP-9. In addition, the effects of [Pt(acac)<sub>2</sub>(DMS)] on NHE1

activity (Fig. 6C), wound-healing (Fig. 6D) and transwell invasion (Fig. 6E) were reversed by the pretreatments of cells with DPI.

## Discussion

The tumor acidic microenvironment exerts profound influence on cancer cell invasion and metastasis and these characteristics are considered as important targets for the development of new anti-cancer therapies. Despite numerous studies in this field, the different relationship between pHi and cell invasion is still poorly understood. Nine mammalian NHE isoforms (NHE1–NHE9) are



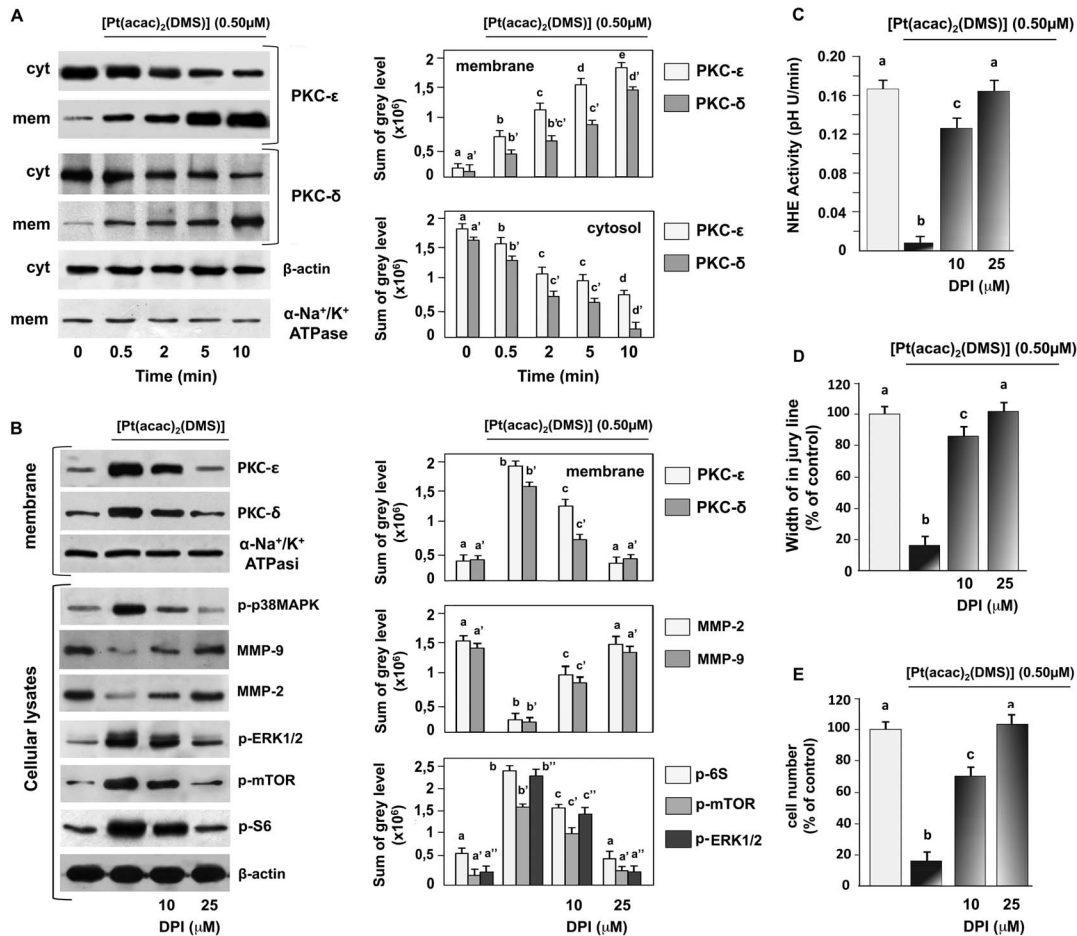

**Figure 6. Role of NAD(P)H oxidase in [Pt(acac)<sub>2</sub>(DMS)] inhibition of SH-SY5Y cell migration and invasion.** (A) SH-SY5Y cells were treated without or with 0.50  $\mu$ M [Pt(acac)<sub>2</sub>(DMS)] for the indicated times. For PKCs translocation studies, cytosol (cyt) and membrane (mem) fractions were analysed by Western blotting with specific antibodies. The purity of fractions was tested with anti  $\beta$ -actin and anti- $\alpha$  subunit of Na<sup>+</sup>/K<sup>+</sup> ATPase monoclonal antibodies. The figures are representative of four independent experiments and results from densitometry are expressed as mean  $\pm$  SD (n=4) of sum of the gray level values. (B–E) SH-SY5Y cells were pre incubated or not with different concentration of DPI and then treated with 0.50  $\mu$ M [Pt(acac)<sub>2</sub>(DMS)]. (B) Membrane fractions or cell lysates were analysed by Western blotting with specific antibodies. Control loadings are shown by  $\beta$ -actin and representative immunoblots are depicted; results from densitometry are expressed as mean  $\pm$  SD (n=4) of sum of the gray level values. (C) NHE1 activities, after acute exposure to an NH<sub>4</sub>Cl acid load, were measured, (D) cell migration was examined using wound closure assay and (E) cell invasion was measured using the transwell invasion assay system. The data are means  $\pm$  S.D. obtained from 4 different experiments. (A–E) P<0.0001 by one-way ANOVA (n=4); values with shared letters are not significantly different according to Bonferroni/Dunn post hoc tests. doi:10.1371/journal.pone.0112186.g006

known and several are upregulated and/or activated in tumours [44], [45]. Altered proton gradients established through upregulated NHE activity sensitise tumour cells much more than normal cells to intracellular acid damage when NHEs are inhibited [46]. Inhibition of NHEs can produce tumour-selective effects. Furthermore, the inhibitory effects of amiloride, ethyl-iso-propylamiloride (EIPA) or 5-(N,N-hexamethylene)amiloride (HMA) on NHEs, particularly NHE1, are thought to be responsible, at least in part, for its anticancer effects [47], [48].

In this paper we show that the inhibition of NHE1 constitutively expressed by SH-SY5Y cells [38], [39] by Zoniporide blocks migration and invasion indicating that these events are mainly mediated by NHE1 activity. We also show that the decrement of the NHE1 activity and the inhibition of migration and invasion of SH-SY5Y cells can be obtained by [Pt(acac)<sub>2</sub>(DMS)]. We previously showed that besides its potent anti-cancer activity *in vitro* and *in vivo* [20], [23–28] [Pt(acac)<sub>2</sub>(DMS)] also prevented the events leading to metastasis via alterations of MMP-2 and -9 production and activity in MCF-7 breast cancer cells [33]. We

show in this paper that [Pt(acac)<sub>2</sub>(DMS)] activated PKC- $\epsilon$ /PKC- $\delta$  and ERK1/2 via the ROS generated by NADPH oxidase. The inhibition of ERK1/2 blocks the [Pt(acac)<sub>2</sub>(DMS)]-induced NHE1 inhibition and restores SH-SY5Y cell motility. Similarly, ERK1/2 activation by Troglitazone decreased NHE activity and pH<sub>i</sub> in MCF-7 cells and in proximal tubule cells [30], [31]. In addition, in the medullary thick ascending limb cells of the rat kidney, aldosterone inhibited NHE3 through rapid activation of the ERK signaling pathway and NGF-induced ERK activation inhibited both basal (NHE1 mediated) and apical (NHE3 mediated) surface acid extrusion [49], [50]. On the other hand, ERK1/2 activation is generally associated with growth factor stimulations, enhanced acid extrusion, and elevated pH<sub>i</sub> as in the rat myocardium [51]. Interestingly, NGF inhibited NHE1 through the parallel activation of PI3K-mTOR and ERK signaling pathways [42]. ERK-mediated regulation of NHE1 activity may occur by direct phosphorylation of the exchanger regulatory domain [51] and/or indirectly through one or more downstream effector(s) [52]. One potential such effector is p70S6K. We show in this paper that

[Pt(acac)<sub>2</sub>(DMS)] increases the phosphorylation of mTOR and also of the downstream component in rapamycin-dependent mTOR signaling pathway, S6. Little is known regarding the mechanism by which p70S6K regulate acid extrusion; however, it has been reported that, in cultured human renal proximal tubule cells, gastrin-induced S6 activation increased the phosphorylation and internalization of NHE3, therefore decreasing its expression at the cell surface [53].

Akt is a downstream target of PI3K that links PI3K to mTOR [54]. Although our previous studies indicated that [Pt(acac)<sub>2</sub>(DMS)] activates Akt, we here show that the inhibition of PI3K does not affect mTOR phosphorylation. Thus, regulation of p70S6K in response to [Pt(acac)<sub>2</sub>(DMS)] must therefore involve other signaling events. Although the p70S6K and ERK cascades have been believed to lie on distinct pathways [55–57], in accordance with another study [58], our results indicate the presence of a signaling cross-talk between these cascades, as S6 activation was blocked by the MEK/ERK inhibition (Fig. 3B). The sensitivity to rapamycin (Fig. 4E) is consistent with in a signaling pathway linking [Pt(acac)<sub>2</sub>(DMS)] to NHE1 inhibition through ERK, mTOR, and S6, as shown in Fig. 7. p70S6K has recently been indicated as a key signalling pathway for development of Th17 cells and as such it has been proposed that specific inhibitors of p70S6K may have a beneficial role in autoimmune diseases [59], [60]. Th17 cells appears to initiate, maintain, and enhance protective antitumor immunity in some cases. How the tumour regulates downstream signaling pathways in Th17 cells might impact their fate; however, natural versus induced Th17 cells are regulated by Akt and mTOR pathways [61]. Therefore, a future study of [Pt(acac)<sub>2</sub>(DMS)] as anticancer and immunostimulatory agent for a vast array of malignancies would appear to be worthwhile. In addition to its well-known ion translocation function, the C-terminal cytoplasmic tail of NHE1 interacts with actin-binding proteins resulting in promotion of cytoskeletal reorganization and cell migration. Indeed, the inhibition of critical component in these pathway restored SH-SY5Y cell motility in wound-healing assays but not in transwell invasion assays [37].

Cell invasion typically characterize cancer cells with actin remodeling being one of the crucial elements of a deregulated actin system in malignant transformation. Degradation of ECM is another of the first steps in tumor invasion and metastasis and metalloproteases (MMPs) have been strongly implicated in this step [62]. MMPs correlate with tumour expansion and poor prognosis [32]. MMPs also play an important role in the invasion of malignant cancer cells into the surrounding and far distant normal tissue that will cause difficulty in the chemotherapy of patients [63]. Therefore, the inhibition of MMPs may be a useful strategy in the early tumor stages. It was reported that MMP2 and MMP9 are predominantly expressed in neuroblastomas and that both MMPs mediate invasion and angiogenesis [64], [65]; they show increased expression in advanced stage disease [66–67]. Here we found that [Pt(acac)<sub>2</sub>(DMS)] inhibited expression and secretion of MMP2 and MMP9 in SH-SY5Y cells.

The effects of [Pt(acac)<sub>2</sub>(DMS)] on tumor cell invasion is associated with p38/MAPK. In fact, the p38/MAPK inhibitor SB203580 reversed the [Pt(acac)<sub>2</sub>(DMS)]-provoked inhibition of MMPs secretion (Fig. 4D). We determined the position of p38/MAPK in the signalling pathway chain from ROS production to invasion inhibition. The down-regulation of PKC- $\delta$  by siRNA-PKC- $\delta$  blocked p38/MAPK activation and reversed the [Pt(acac)<sub>2</sub>(DMS)]-provoked inhibition of cell migration through transwells (Fig. 5B). The activation of PKC- $\delta$  monitored following its cytosol-to-membrane translocation induced by [Pt(acac)<sub>2</sub>(DMS)] was blocked by the inhibition of the NADPH oxidase (Fig. 6B).

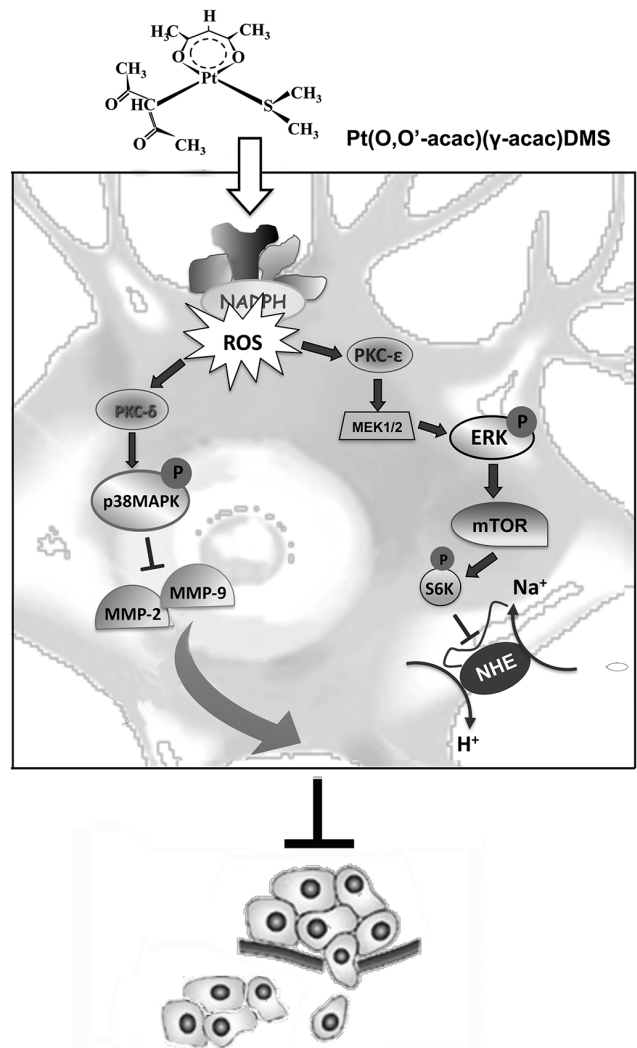

**Figure 7. Mechanisms of [Pt(acac)<sub>2</sub>(DMS)]-mediated inhibition of human neuroblastoma SH-SY5Y cell migration and invasion.** [Pt(acac)<sub>2</sub>(DMS)] inhibits NHE1 activity through PKC- $\epsilon$  and downregulates MMP-2/9 production and secretion through PKC- $\delta$  starting from NADPH ROS generation.

doi:10.1371/journal.pone.0112186.g007

Taken together, these findings suggested that the inhibition on invasion and migration by [Pt(acac)<sub>2</sub>(DMS)] may be through a down-regulation of MMP2, MMP9 levels and NHE activity of SH-SY5Y cancer cells.

In conclusion, we have shown a drastic impairment of cell motility in response to the inhibition of the NHE1 by [Pt(acac)<sub>2</sub>(DMS)] occurring through a novel mechanism mediated by PKC- $\epsilon$ /ERK/mTOR pathway. Since altered proton gradients established through upregulated NHE activity sensitise tumour cells much more than normal cells to intracellular acid damage when NHEs are inhibited [46], selective inhibition by [Pt(acac)<sub>2</sub>(DMS)] of the molecular mechanisms leading to NHE1 activation may therefore represent an alternative approach to decrease cancer invasion and motility.

#### Author Contributions

Conceived and designed the experiments: SM AM. Performed the experiments: CV NC LGC. Analyzed the data: AM. Contributed reagents/materials/analysis tools: FPF. Contributed to the writing of the

manuscript: AM SM. Synthesized and characterized the Pt compound:

SADP. Conceived and supervised the drug design, the synthesis and characterization of Pt compounds: FPF.

## References

- Warburg O (1930) *The Metabolism of Tumors*. London: Constable and Company. 327 p.
- Putney LK, Barber DL (2004) Expression profile of genes regulated by activity of the Na-H exchanger NHE1. *BMC Genomics* 16: 5–46.
- Simchowicz L, Cragoe EJ Jr (1986) Regulation of human neutrophil chemotaxis by intracellular pH. *J Biol Chem* 261: 6492–6500.
- Lagana A, Vadnais J, Le PU, Nguyen TN, Laprade R, et al. (2000) Regulation of the formation of tumor cell pseudopodia by the Na<sup>+</sup>/H<sup>+</sup> exchanger NHE1. *J Cell Sci* 113: 3649–3662.
- Schwab A (2001) Function and spatial distribution of ion channels and transporters in cell migration. *Am J Physiol Renal Physiol* 280: 739–747.
- Reshkin SJ, Bellizzi A, Albarani V, Guerra L, Tommasino M, et al. (2000) Phosphoinositide 3-kinase is involved in the tumor-specific activation of human breast cancer cell Na<sup>+</sup>/H<sup>+</sup> exchange, motility, and invasion induced by serum deprivation. *J Biol Chem* 275: 5361–5369.
- McHardy LM, Sinotte R, Troussard A, Sheldon C, Church J, et al. (2004) The tumor invasion inhibitor dihydromotuporamine C activates RHO, remodels stress fibers and focal adhesions, and stimulates sodium-proton exchange. *Cancer Res* 64: 1468–1474.
- Paradiso A, Cardone RA, Bellizzi A, Bagorda A, Guerra L, et al. (2004) The Na<sup>+</sup>-H<sup>+</sup> exchanger-1 induces cytoskeletal changes involving reciprocal RhoA and Rac1 signaling, resulting in motility and invasion in MDA-MB-435 cells. *Breast Cancer Res* 6: 616–628.
- Cardone R, Casavola V, Reshkin S (2005) The role of disturbed pH dynamics and the Na<sup>+</sup>/H<sup>+</sup> exchanger in metastasis. *Nat Rev Cancer* 5: 786–795.
- Ritter M (1998) Cell volume regulatory ion transport in cell migration. *Contrib Nephrol* 123: 135–157.
- Denker SP, Barber DL (2002) Cell migration requires both ion translocation and cytoskeletal anchoring by the Na-H exchanger NHE1. *J Cell Biol* 159: 1087–1096.
- Stock C, Gassner B, Hauck CR, Arnold H, Mally S, et al. (2005) Migration of human melanoma cells depends on extracellular pH and Na<sup>+</sup>/H<sup>+</sup> exchange. *J Physiol* 567: 225–238.
- Putney L, Denker S, Barber D (2002) The changing face of the Na<sup>+</sup>/H<sup>+</sup> exchanger, NHE1: structure, regulation, and cellular actions. *Annu Rev Pharmacol Toxicol* 42: 527–552.
- Baumgartner M, Patel H, Barber D (2004) Na<sup>+</sup>/H<sup>+</sup> exchanger NHE1 as plasma membrane scaffold in the assembly of signaling complexes. *Am J Physiol* 287: 844–850.
- Putney LK, Barber DL (2004) Expression profile of genes regulated by activity of the Na-H exchanger NHE1. *BMC Genomics* 16: 5–46.
- Entschladen F, Drell T IV, Lang K, Joseph J, Zaenker K (2004) Tumor-cell migration, invasion, and metastasis: navigation by neurotransmitters. *Lancet Oncol* 5: 254–258.
- Friedl P, Wolf K (2003) Cell-cell invasion and migration: diversity and escape mechanisms. *Nature* 3: 362–374.
- Kassis J, Lauffenburger DA, Turner T, Wells A (2001) Tumor invasion as dysregulated cell motility. *Semin Cancer Biol* 11: 105–117.
- De Pascali SA, Papadia P, Capoccia S, Marchiò L, Lanfranchi M, et al. (2009) Hard/soft selectivity in ligand substitution reactions of b-diketonate platinum(II) complexes. *Dalton Trans* 37: 7786–7795.
- Muscella A, Calabriso N, Fanizzi FP, De Pascali SA, Urso L, et al. (2008) [Pt(O,O'-acac)(γ-acac)(DMS)], a new Pt compound exerting fast cytotoxicity in MCF-7 breast cancer cells via the mitochondrial apoptotic pathway. *Br J Pharmacol* 153: 34–49.
- De Pascali SA, Lugoli F, De Donno A, Fanizzi FP (2011) Mutagenic Tests Confirm That New Acetylacetonate Pt(II) Complexes Induce Apoptosis in Cancer Cells Interacting with Nongenomic Biological Targets. *Met Based Drugs* 2011: 763436.
- De Pascali SA, Muscella A, Vetrugno C, Marsigliante S, Fanizzi FP (2014) Synthesis, characterization and cytotoxicity of novel Pt(II) κ<sup>2</sup>O,O'-acetylacetonate complexes with nitrogen ligands. *Inorg Chim Acta* 412: 88–93.
- Muscella A, Calabriso N, De Pascali SA, Urso L, Ciccarese A, et al. (2007) New platinum II complexes containing both an O,O'-chelated acetylacetonate ligand and a sulfur ligand in the platinum coordination sphere induce apoptosis in HeLa cervical carcinoma cells. *Biochem Pharmacol* 74: 28–40.
- Muscella A, Calabriso N, Vetrugno C, Fanizzi FP, De Pascali SA, et al. (2011) The signalling axis mediating neuronal apoptosis in response to [Pt(O,O'-acac)(γ-acac)(DMS)]. *Biochem Pharmacol* 81: 1271–1285.
- Muscella A, Calabriso N, Vetrugno C, Fanizzi FP, De Pascali SA, et al. (2011) The platinum (II) complex [Pt(O,O'-acac)(γ-acac)(DMS)] alters the intracellular calcium homeostasis in MCF-7 breast cancer cells. *Biochem Pharmacol* 81: 91–103.
- Muscella A, Vetrugno C, Fanizzi FP, Manca C, De Pascali SA, et al. (2013) A new platinum(II) compound anticancer drug candidate with selective cytotoxicity for breast cancer cells. *Cell Death Dis* 4: e796.
- Muscella A, Vetrugno C, Migoni D, Biagioni F, Fanizzi FP, et al. (2014) Antitumor activity of [Pt(O,O'-acac)(γ-acac)(DMS)] in mouse xenograft model of breast cancer. *Cell Death Dis* 5: e1014.
- Vetrugno C, Muscella A, Fanizzi FP, Cossa LG, Migoni D, et al. (2014) Different apoptotic effects of [Pt(O,O'-acac)(γ-acac)(DMS)] and cisplatin on normal and cancerous human epithelial breast cells in primary culture. *Br J Pharmacol* doi:10.1111/bph.12831.
- Cuello F, Snabaitis AK, Cohen MS, Taunton J, Avkiran M (2007) Evidence for direct regulation of myocardial Na<sup>+</sup>/H<sup>+</sup> exchanger isoform 1 phosphorylation and activity by 90-kDa ribosomal S6 kinase (RSK): effects of the novel and specific RSK inhibitor fmk on responses to alpha1-adrenergic stimulation. *Mol Pharmacol* 71: 799–806.
- Friday E, Oliver R 3rd, Welbourne T, Turturro F (2007) Role of epidermal growth factor receptor (EGFR)-signaling versus cellular acidosis via Na<sup>+</sup>/H<sup>+</sup> exchanger1(NHE1)-inhibition in troglitazone-induced growth arrest of breast cancer-derived cells MCF-7. *Cell Physiol Biochem* 20: 751–762.
- Oliver R 3rd, Friday E, Turturro F, Lacy A, Welbourne T (2005) Troglitazone's rapid and sustained activation of ERK1/2 induces cellular acidosis in LLC-PK1-F+ cells: physiological responses. *Am J Physiol Renal Physiol* 288: 1257–1266.
- Wolf K, Friedl P (2009) Mapping proteolytic cancer cell-extracellular matrix interfaces. *Clin Exp Metastasis* 26: 289–298.
- Muscella A, Calabriso N, Vetrugno C, Urso L, Fanizzi FP, et al. (2010) Sublethal concentrations of the platinum(II) complex [Pt(O,O'-acac)(γ-acac)(DMS)] alter the motility and induce anoikis in MCF-7 cells. *Br J Pharmacol* 160: 1362–1377.
- Marsigliante S, Vetrugno C, Muscella A (2013) CCL20 induces migration and proliferation on breast epithelial cells. *J Cell Physiol* 228: 1873–1883.
- Muscella A, Marsigliante S, Verri T, Urso L, Dimitri C, et al. (2008) PKC-ε-dependent cytosol-to-membrane translocation of pendrin in thyroid PC C13 cells. *J Cell Physiol* 217: 103–112.
- De Pascali SA, Papadia P, Ciccarese A, Pacifico C, Fanizzi FP (2005) First examples of b-diketonate platinum(II) complexes with sulfoxide ligands. *Eur J Inorg Chem* 5: 788–796.
- Marshall J (2011) Transwell invasion assays. *Methods Mol Biol* 769: 97–110.
- Yamada T, Inazu M, Tajima H, Matsumiya T (2011) Functional expression of choline transporter-like protein 1 (CTL1) in human neuroblastoma cells and its link to acetylcholine synthesis. *Neurochem Int* 58: 354–365.
- Reid AC, Mackins CJ, Seyedi N, Levi R, Silver RB (2004) Coupling of angiotensin II AT1 receptors to neuronal NHE activity and carrier-mediated norepinephrine release in myocardial ischemia. *Am J Physiol Heart Circ Physiol* 286: 1448–1454.
- Marala RB, Brown JA, Kong JX, Tracey WR, Knight DR, et al. (2002) Zoniporide: a potent and highly selective inhibitor of human Na<sup>+</sup>/H<sup>+</sup> exchanger-1. *Eur J Pharmacol* 451: 37–41.
- Liu L, Parent CA (2011) TOR kinase complexes and cell migration. *J Cell Biol* 194: 815–824.
- Good DW, George T, Watts BA (2008) Nerve growth factor inhibits Na<sup>+</sup>/H<sup>+</sup> exchange and formula absorption through parallel phosphatidylinositol 3-kinase-TOR and ERK pathways in thick ascending limb. *J Biol Chem* 283: 26602–26611.
- Chou MM, Blenis J (1995) The 70 kDa S6 kinase: regulation of a kinase with multiple roles in mitogenic signalling. *Curr Opin Cell Biol* 7: 806–814.
- Slepov ER, Rainey JK, Sykes BD, Fliegel L (2007) Structural and functional analysis of the Na<sup>+</sup>/H<sup>+</sup> exchanger. *Biochem J* 401: 623–633.
- Beltrán AR, Ramírez MA, Carraro-Lacroix LR, Hiraki Y, Rebouças NA, et al. (2008) NHE1, NHE2, and NHE4 contribute to regulation of cell pH in T84 colon cancer cells. *Pflugers Arch* 455: 799–810.
- Yamagata M, Tannock IF (1996) The chronic administration of drugs that inhibit the regulation of intracellular pH: in vitro and anti-tumour effects. *Brit J Cancer* 73: 1328–1334.
- Yang X, Wang D, Dong W, Song Z, Dou K (2010) Inhibition of Na<sup>+</sup>/H<sup>+</sup> exchanger 1 by 5-(N-ethyl-N-isopropyl) amiloride reduces hypoxia-induced hepatocellular carcinoma invasion and motility. *Cancer Lett* 295: 198–204.
- Bourguignon LY, Singleton PA, Diedrich F, Stern R, Gilad E (2004) CD44 interaction with Na<sup>+</sup>-H<sup>+</sup> exchanger (NHE1) creates acidic microenvironments leading to hyaluronidase-2 and cathepsin B activation and breast tumor cell invasion. *J Biol Chem* 279: 26991–27007.
- Bruns A, Watts III, David W Good (2002) ERK mediates inhibition of Na<sup>+</sup>/H<sup>+</sup> exchange and HCO<sub>3</sub><sup>-</sup> absorption by nerve growth factor in MTAL. *Am J Physiol Renal Physiol* 282: 1056–1063.
- Watts BA 3rd, George T, Good DW (2006) Aldosterone inhibits apical NHE3 and HCO<sub>3</sub><sup>-</sup> absorption via a non genomic ERK-dependent pathway in medullary thick ascending limb. *Am J Physiol Renal Physiol* 291: 1005–1013.
- Moor AN, Fliegel L (1999) Protein kinase-mediated regulation of the Na/H exchanger in the rat myocardium by mitogen-activated protein kinase-dependent pathways. *J Biol Chem* 274: 22985–22992.
- Bianchini L, L'Allemain G, Pouyssegur J (1997) The p42/p44 mitogen-activated protein kinase cascade is determinant in mediating activation of the Na<sup>+</sup>/H<sup>+</sup>

- exchanger (NHE1 isoform) in response to growth factors. *J Biol Chem* 272: 271–279.
53. Liu T, Jose PA (2013) Gastrin induces sodium-hydrogen exchanger 3 phosphorylation and mTOR activation via a phosphoinositide 3-kinase-/protein kinase C-dependent but AKT-independent pathway in renal proximal tubule cells derived from a normotensive male human. *Endocrinology* 154: 865–875.
  54. Fingar DC, Blenis J (2004) Target of rapamycin (TOR): an integrator of nutrient and growth factor signals and coordinator of cell growth and cell cycle progression. *Oncogene* 23: 3151–3171.
  55. Ballou LM, Luther H, Thomas G (1991) MAP2 kinase and 70K S6 kinase lie on distinct signalling pathways. *Nature* 349: 348–350.
  56. Chung J, Grammer TC, Lemon KP, Kazlauskas A, Blenis J (1994) PDGF- and insulin-dependent pp70S6k activation mediated by phosphatidylinositol-3-OH kinase. *Nature* 370: 71–75.
  57. Ming XF, Burgering BM, Wennström S, Claesson-Welsh L, Heldin CH, et al. (1994) Activation of p70/p85 S6 kinase by a pathway independent of p21ras. *Nature* 371: 426–429.
  58. Lenormand P, McMahon M, Pouyssegur J (1996) Oncogenic Raf-1 activates p70 S6 kinase via a mitogen-activated protein kinase-independent pathway. *J Biol Chem* 271: 15762–15786.
  59. Kurebayashi Y, Nagai S, Ikejiri A, Ohtani M, Ichiyama K, et al. (2012) PI3K-Akt-mTORC1-S6K1/2 axis controls Th17 differentiation by regulating Gfi1 expression and nuclear translocation of ROR $\gamma$ . *Cell Rep* 1: 360–373.
  60. Petković F, Blaževski J, Momčilović M, Timotijević G, Zocca MB, et al. (2013) Saquinavir-NO inhibits S6 kinase activity, impairs secretion of the encephalytogenic cytokines interleukin-17 and interferon-gamma and ameliorates experimental autoimmune encephalomyelitis. *J Neuroimmunol* 259: 55–65.
  61. Kim JS, Sklarz T, Banks LB, Gohil M, Waickman AT, et al. (2013) Natural and Inducible TH17 cells are regulated differently by Akt and mTOR pathways. *Nat Immunol* 14: 611–618.
  62. Hua H, Li M, Luo T, Yin Y, Jiang Y (2011) Matrix metalloproteinases in tumorigenesis: an evolving paradigm. *Cell Mol Life Sci* 68: 3853–3868.
  63. Morozov GE, Kozlova NI, Cheglakov IB, Ushakova NA, Preobrazhenskaya ME, et al. (2008) Implication of alpha5beta1 integrin in invasion of drug-resistant MCF-7/ADR breast carcinoma cells: a role for MMP-2 collagenase. *Biochemistry* 73: 791–796.
  64. Chantrain CF, Shimada H, Jodele S, Groshen S, Ye W, et al. (2004) Stromal matrix metalloproteinase-9 regulates the vascular architecture in neuroblastoma by promoting pericyte recruitment. *Cancer Res* 64: 1675–1686.
  65. Ribatti D, Marimpietri D, Pastorino F, Brignole C, Nico B, et al. (2004) Angiogenesis in neuroblastoma. *Ann N Y Acad Sci* 1028: 133–142.
  66. Sugiura Y, Shimada H, Seeger RC, Laug WE, DeClerck YA (1998) Matrix metalloproteinases-2 and -9 are expressed in human neuroblastoma: contribution of stromal cells to their production and correlation with metastasis. *Cancer Res* 58: 2209–2216.
  67. Cheng Y, Dong Q, Sun LR, Yang CM, Jiang BX (2005) Correlation between expression of MMP-2, MMP-9, TIMP-2, TIMP-1 and metastasis of neuroblastoma. *Zhonghua Zhong Liu Za Zhi* 27: 164–166.
